# Supplementary material
Source: PubMed Central journal article supplement (PMC2663755)
Supplement: pp.109.135301_2.pdf [file pp.109.135301_2.pdf]

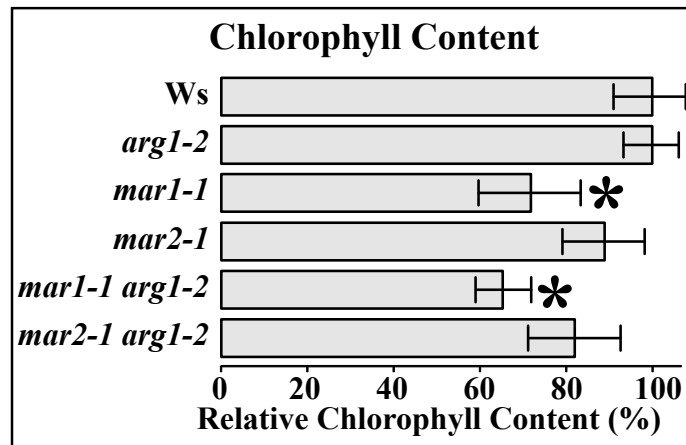

**Figure S2.** *mar1* plants accumulate less chlorophyll than wild-type. Samples were collected from rosette leaves from 5 individual plants for each genotype (5 individuals per trial X 5 trials per genotype = 25 individuals). Acetone-solubilized chlorophyll was measured and values were normalized to Ws. T-tests for each genotype compared to Ws showed a slight decrease in chlorophyll in *mar2-1* and *mar2-1 arg1-2* that was not statistically significant ( $p > 0.05$ ), while *mar1-1 arg1-2* accumulates statistically less chlorophyll than Ws. Stars represent significant T-test values ( $p < 0.05$ ) compared to Ws. Error bars represent standard errors.
