# Supplementary material
Source: PubMed Central journal article supplement (PMC2663755)
Supplement: pp.109.135301_3.pdf [file pp.109.135301_3.pdf]

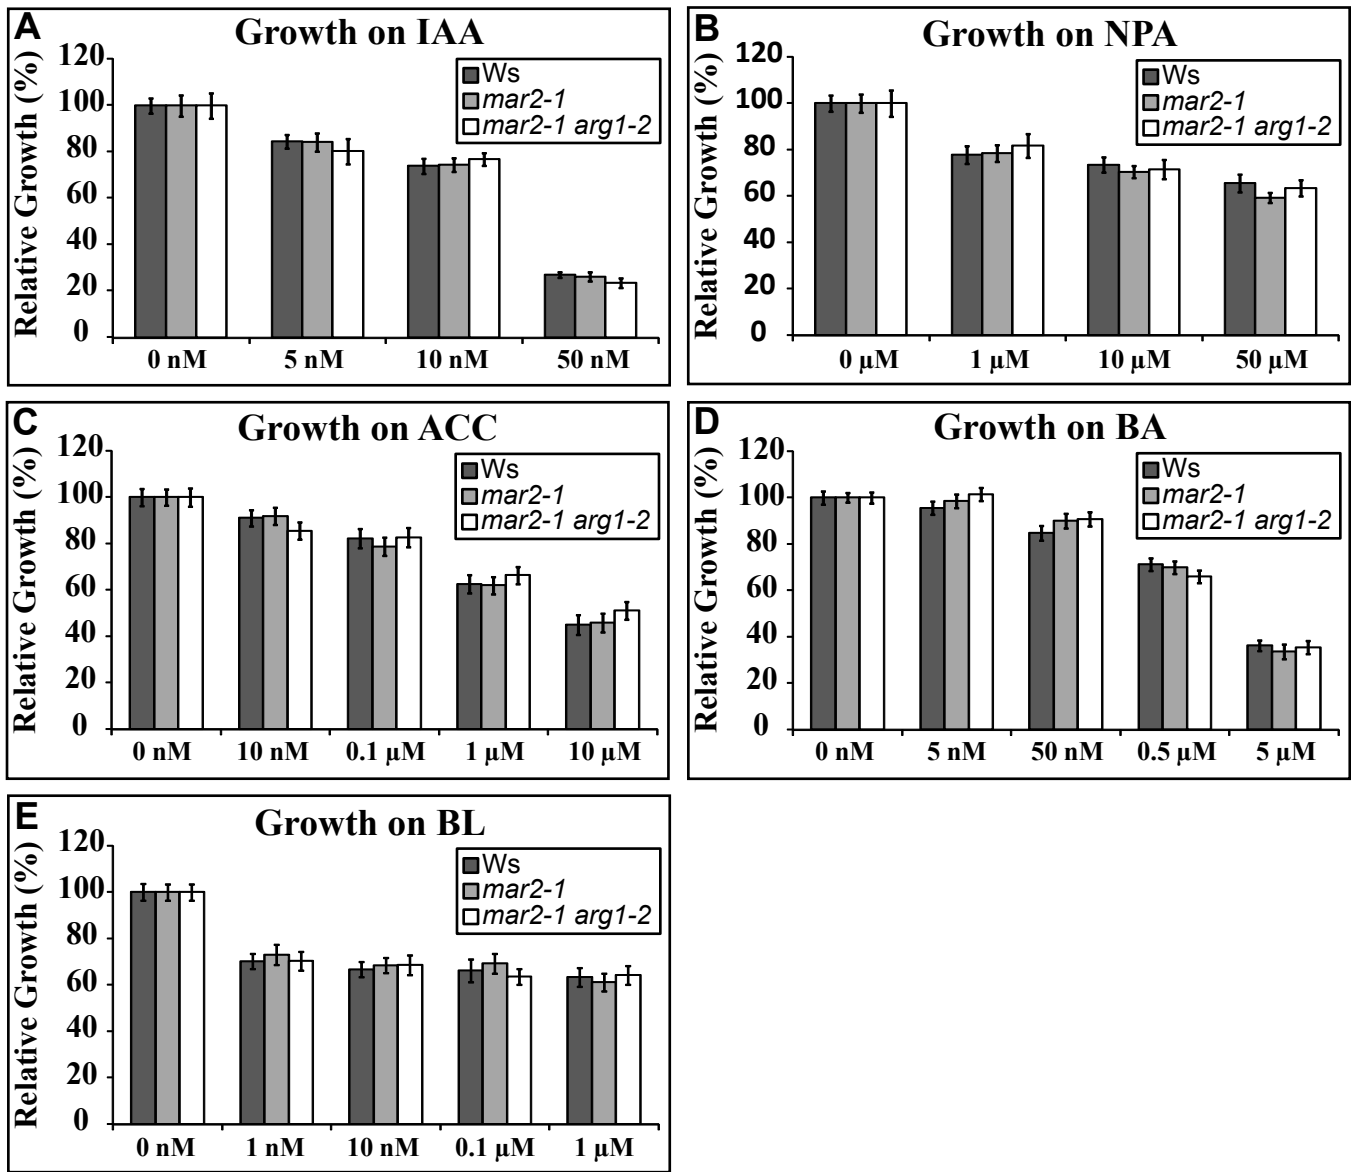

**Figure S3.** Root growth sensitivity to phytohormones and naphthylphthalamic acid (NPA), a polar auxin transport inhibitor. Roots (n=47-54) were grown for 4 days on vertically-oriented, 0.8% agar-containing, GM plates before being transferred to media supplemented with the indicated concentrations of: (A) indole-3-acetic acid (IAA); (B) NPA; (C) aminocyclopropane-1-carboxylic acid (ACC); (D) 6-benzylaminopurine (BA); or (E) brassinolide (BL). Growth after 24 hours was measured and normalized to growth on drug-free media for each genotype. Error bars represent standard errors. T-tests among each drug treatment showed no significant differences ( $p < 0.05$ ).
