# Supplementary material
Source: PubMed Central journal article supplement (PMC2663755)
Supplement: pp.109.135301_4.pdf [file pp.109.135301_4.pdf]

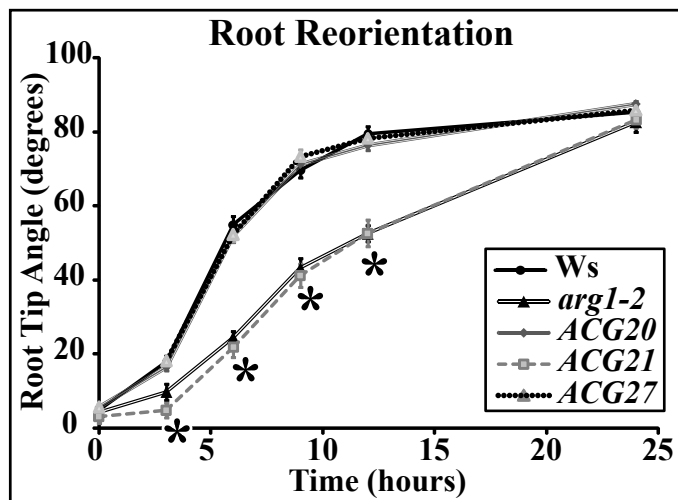

**Figure S4.** Some intermediate starch mutant roots have a wild-type gravitropic reorientation. Roots of 5-day-old *ACG20* and *ACG27* seedlings grown embedded in vertical 0.8% agar-containing GM medium respond to 90° gravistimulation similarly to *Ws*. The starchless mutant *ACG21* and *arg1-2* both respond significantly slower than *Ws*. Error bars represent standard errors, stars represent significant T-test values ( $p < 0.05$ ) compared to *Ws*;  $n = 52-83$ .
